# Supplementary material
Source: PubMed Central journal article supplement (PMC4170117)
Supplement: supp_mol.112.081315_Supplemental_data.pdf [file supp_mol.112.081315_Supplemental_data.pdf]

**Molecular Pharmacology**

**Supplemental Data**

**Functional characterization of three mouse formyl peptide receptors**

Hui-Qiong He, Dan Liao, Zhen-Guo Wang, Zhong-Li Wang, Hu-Chen Zhou,

Ming-Wei Wang, Richard D. Ye

## **Molecular Pharmacology**

### **Supplemental Figure Legends**

#### **Supplemental Figure 1. Degranulation induced by formyl peptides at different concentrations.**

Release of  $\beta$ -hexosaminidase by fMLFE, fMLFK, fMLFK, fMLFII, fMIFL, fMIVTLF and fMMYALF at concentrations 10 nM (A), 100 nM (B) and 10  $\mu$ M (C) were shown using RBL cells expressing mFpr1, mFpr2 or mFpr-rs1 respectively. Values are mean  $\pm$  S.E.M. of single duplicate determinations and representative of at least three separate experiments.

#### **Supplemental Figure 2. Calcium mobilization in RBL-mFpr cells stimulated with WKYMVm, fMLF, fMIFL and fMLFIK.**

The upper panels show the typical transient calcium rise in response to the indicated agonist concentration. The lower panels are dose-dependent curves measured by a sigmoidal fit, which were based on peak  $\text{Ca}^{2+}$  increase at indicated agonist concentrations and shown as mean  $\pm$  S.E.M. representing  $> 3$  separate experiments.

#### **Supplemental Figure 3. Cell surface expression of mFpr-rs1 and Flag-tagged mFpr-rs1 receptors.**

The HeLa cells were transiently transfected to express unlabeled (A) mFpr-rs1 receptor and Flag-tagged receptors (B) mFpr-rs1-N-FLAG and (C) mFpr-rs1-C-FLAG. Thirty-six hours after the transfection, cells were incubated with an anti-FLAG antibody and labeled with Alexa Fluoro 488-conjugated secondary antibody.

# Supplemental Figure 1

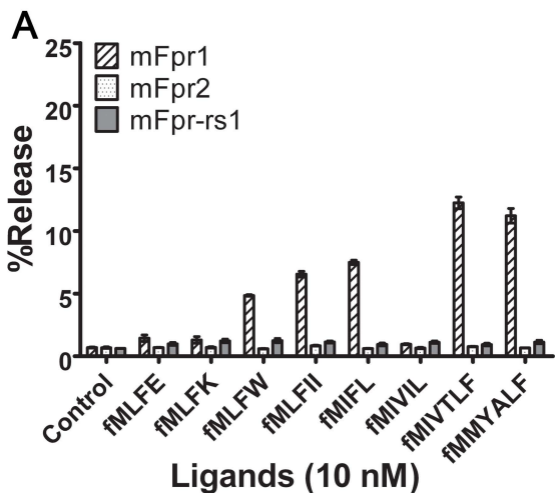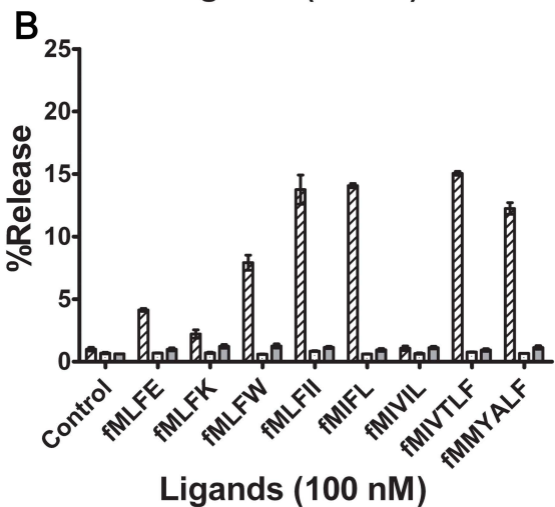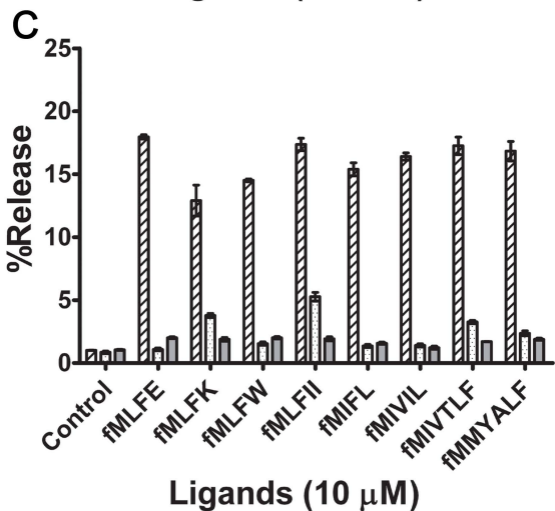

# Supplemental Figure 2

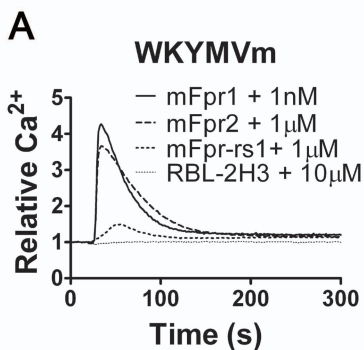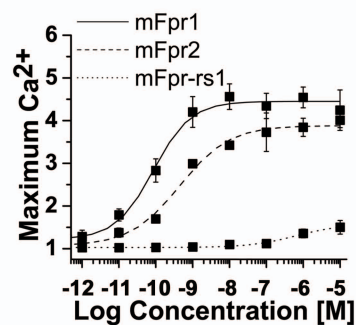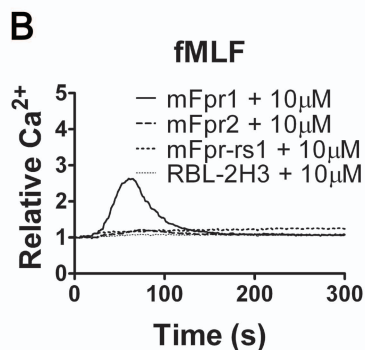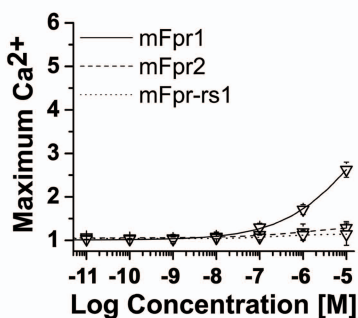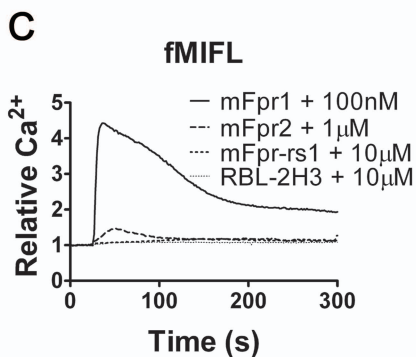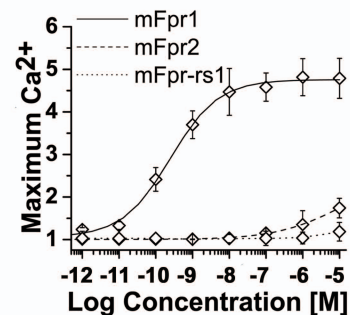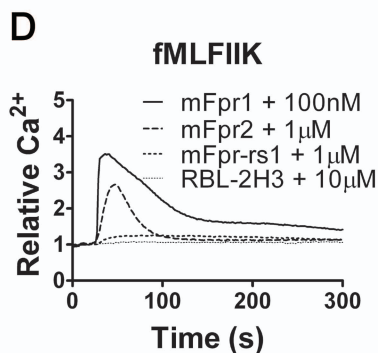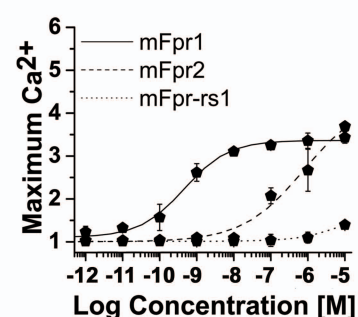

# Supplemental Figure 3

**A**

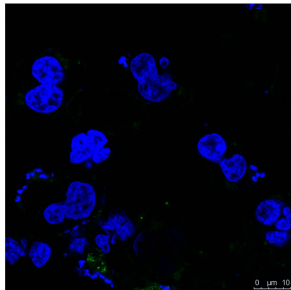

mFpr-rs1-HeLa

**B**

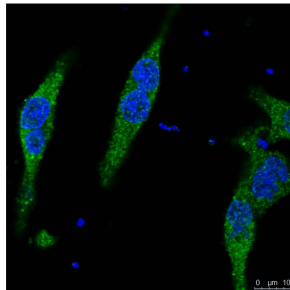

mFpr-rs1-C-Flag-HeLa

**C**

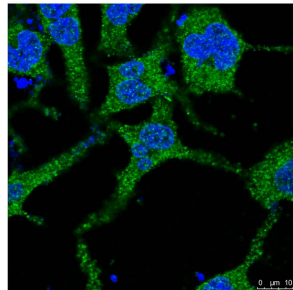

mFpr-rs1-N-Flag-HeLa
